# Supplementary material
Source: Elsevier journal article supplement (https://www.sciencedirect.com/science/article/pii/S0210570519302535)
Supplement: mmc1 [file S0210570519302535:mmc1.doc]

Supplementary File.

**Remaining authors and affiliations***

Milagrosa Montes6, Ariadna Figuerola9, Sergio Lario9, EIA Quilez9.

*6. Microbiology Service of Donostia University Hospital and Instituto Biodonostia, Centro de Investigación Biomédica en Red de Enfermedades Respiratorias (CIBERES), San Sebastián, Spain.*

*9. Digestive Service of Hosptial Universitari Parc Tauli, and CIBERehd, Sabadell, Spain.*

*As described in author’s contributions these authors collected and helped interpreting data, critically reviewed the manuscripts’ drafts, and approved the submitted manuscript, and should be indexed as authors in databases

Milagrosa Montes e-mail [MARIAMILAGROSA.MONTESROS@osakidetza.eus](mailto:MARIAMILAGROSA.MONTESROS@osakidetza.eus)

Ariadna Figuerola e-mail [AFiguerola@tauli.cat](mailto:AFiguerola@tauli.cat)

Sergio Lario e-mail [sergio.lario@ciberehd.org](mailto:sergio.lario@ciberehd.org)

EIA Quilez e-mail [mquilez@tauli.cat](mailto:mquilez@tauli.cat)
